# Supplementary material
Source: PubMed Central journal article supplement (PMC8710183)
Supplement: NIHMS1710550-supplement-1.pdf [file NIHMS1710550-supplement-1.pdf]

## Supplementary Material

Table S1

Means, adjusted means, standard deviations, and standard errors for depressive symptoms on the CDI-2 subscales for each diagnostic group (ASD vs. NT) and sex (male vs. female) in the total sample

| CDI-2 <sup>c</sup> Subscales<br>(T-scores) | Diagnostic Groups (Total Sample N=212) |                                       |                                     |                                       | F      | p      | $\eta^2_p$ |
|--------------------------------------------|----------------------------------------|---------------------------------------|-------------------------------------|---------------------------------------|--------|--------|------------|
|                                            | ASD <sup>a</sup>                       |                                       | NT <sup>b</sup>                     |                                       |        |        |            |
|                                            | Male<br><i>M<sub>adj</sub></i> (SE)    | Female<br><i>M<sub>adj</sub></i> (SE) | Male<br><i>M<sub>adj</sub></i> (SE) | Female<br><i>M<sub>adj</sub></i> (SE) |        |        |            |
| <i>Negative Mood/Physical Symptoms</i>     | 56.78 (1.1)                            | 56.14 (1.9)                           | 50.64 (1.5)                         | 53.63 (1.7)                           |        |        |            |
| Interaction                                |                                        |                                       |                                     |                                       | 1.303  | 0.255  | 0.006      |
| Sex                                        |                                        |                                       |                                     |                                       | 0.544  | 0.462  | 0.003      |
| Diagnosis                                  |                                        |                                       |                                     |                                       | 6.237  | 0.013  | 0.029      |
| <i>Negative-Self Esteem</i>                | 53.24 (1.0)                            | 56.62 (1.8)                           | 49.49 (1.4)                         | 50.24 (1.6)                           |        |        |            |
| Interaction                                |                                        |                                       |                                     |                                       | 0.783  | 0.377  | 0.004      |
| Sex                                        |                                        |                                       |                                     |                                       | 1.917  | 0.168  | 0.009      |
| Diagnosis                                  |                                        |                                       |                                     |                                       | 9.762  | 0.002  | 0.045      |
| <i>Ineffectiveness</i>                     | 57.00 (1.2)                            | 60.46 (2.1)                           | 49.52 (1.6)                         | 54.91 (1.9)                           |        |        |            |
| Interaction                                |                                        |                                       |                                     |                                       | 0.312  | 0.577  | 0.002      |
| Sex                                        |                                        |                                       |                                     |                                       | 6.476  | 0.012  | 0.030      |
| Diagnosis                                  |                                        |                                       |                                     |                                       | 11.969 | 0.001  | 0.055      |
| <i>Interpersonal Problems</i>              | 57.50 (1.3)                            | 57.23 (2.4)                           | 44.86 (1.9)                         | 50.58 (2.2)                           |        |        |            |
| Interaction                                |                                        |                                       |                                     |                                       | 2.277  | 0.133  | 0.011      |
| Sex                                        |                                        |                                       |                                     |                                       | 1.870  | 0.173  | 0.009      |
| Diagnosis                                  |                                        |                                       |                                     |                                       | 20.01  | < .001 | 0.089      |

<sup>a</sup>Autism Spectrum Disorder; <sup>b</sup>Neurotypical; <sup>c</sup>Children's Depression Inventory, Second Edition

**Table S2***Item-level analyses of CDI-2 between males and females in the NT group*

|                                 |                                 | <b>Nonsignificant Differences (28/28 items)</b> |                                         |          |          |                                    |                                 |
|---------------------------------|---------------------------------|-------------------------------------------------|-----------------------------------------|----------|----------|------------------------------------|---------------------------------|
| <b>CDI-2 Subscale</b>           | <b>CDI-2 Items</b>              | <b>Males<sup>a</sup><br/>(n = 51)</b>           | <b>Females<sup>a</sup><br/>(n = 36)</b> | <b>U</b> | <b>p</b> | <b>P<sub>adj</sub><sup>a</sup></b> | <b>PS<sup>b</sup><br/>(0-1)</b> |
| Negative Mood/Physical Symptoms | Item 1<br>(low mood)            | 46/5/0                                          | 32/4/0                                  | 906.0    | 0.845    | 0.909                              | 0.51                            |
|                                 | Item 9<br>(crying)              | 46/5/0                                          | 28/7/1                                  | 801.5    | 0.104    | 0.485                              | 0.57                            |
|                                 | Item 10<br>(irritability)       | 32/18/1                                         | 21/12/3                                 | 856.5    | 0.536    | 0.834                              | 0.53                            |
|                                 | Item 15<br>(sleep quality)      | 40/8/3                                          | 23/9/4                                  | 782.0    | 0.134    | 0.469                              | 0.57                            |
|                                 | Item 16<br>(low energy)         | 32/18/1                                         | 19/14/3                                 | 806.5    | 0.267    | 0.623                              | 0.57                            |
|                                 | Item 17<br>(appetite)           | 43/3/5                                          | 31/5/0                                  | 889.0    | 0.687    | 0.874                              | 0.52                            |
|                                 | Item 18<br>(somatic)            | 33/17/1                                         | 26/8/2                                  | 862.0    | 0.554    | 0.816                              | 0.54                            |
|                                 | Item 26<br>(low energy)         | 50/1/0                                          | 33/2/1                                  | 859.0    | 0.161    | 0.501                              | 0.54                            |
|                                 | Item 27<br>(appetite)           | 42/6/3                                          | 29/4/3                                  | 898.5    | 0.803    | 0.899                              | 0.52                            |
| Negative Self-Esteem            | Item 2<br>(hopelessness)        | 35/16/0                                         | 27/9/0                                  | 859.5    | 0.520    | 0.856                              | 0.53                            |
|                                 | Item 6<br>(self-concept)        | 49/2/0                                          | 30/5/1                                  | 800.0    | 0.042    | 0.588                              | 0.56                            |
|                                 | Item 7<br>(guilt)               | 40/11/0                                         | 30/6/0                                  | 873.0    | 0.572    | 0.801                              | 0.53                            |
|                                 | Item 8<br>(suicidality)         | 46/5/0                                          | 34/1/1                                  | 881.5    | 0.505    | 0.884                              | 0.53                            |
|                                 | Item 13<br>(appearance)         | 40/11/0                                         | 23/12/1                                 | 779.0    | 0.123    | 0.492                              | 0.58                            |
|                                 | Item 24<br>(being loved)        | 49/2/0                                          | 36/0/0                                  | 882.0    | 0.232    | 0.591                              | 0.52                            |
| Ineffectiveness                 | Item 3<br>(daily activity)      | 44/7/0                                          | 31/5/0                                  | 916.5    | 0.983    | 0.983                              | 0.51                            |
|                                 | Item 4<br>(anhedonia)           | 39/12/0                                         | 25/11/0                                 | 853.5    | 0.467    | 0.872                              | 0.54                            |
|                                 | Item 12<br>(concentration)      | 24/25/2                                         | 11/21/4                                 | 737.5    | 0.079    | 0.553                              | 0.60                            |
|                                 | Item 14<br>(volition)           | 31/12/8                                         | 19/14/3                                 | 882.5    | 0.729    | 0.887                              | 0.52                            |
|                                 | Item 20<br>(anhedonia)          | 34/17/0                                         | 21/12/3                                 | 816.0    | 0.297    | 0.639                              | 0.56                            |
|                                 | Item 22<br>(school performance) | 40/11/0                                         | 30/6/0                                  | 873.0    | 0.572    | 0.763                              | 0.53                            |
|                                 | Item 23<br>(worthlessness)      | 38/12/1                                         | 27/8/1                                  | 915.5    | 0.977    | 1.000                              | 0.51                            |
|                                 | Item 28<br>(memory)             | 27/23/1                                         | 17/15/4                                 | 827.0    | 0.377    | 0.754                              | 0.55                            |

|                           |                                |        |         |       |       |       |      |
|---------------------------|--------------------------------|--------|---------|-------|-------|-------|------|
| Interpersonal<br>Problems | Item 5<br>(low mood)           | 50/1/0 | 32/4/0  | 834.0 | 0.073 | 0.681 | 0.55 |
|                           | Item 11<br>(peer satisfaction) | 44/7/0 | 24/11/1 | 734.5 | 0.027 | 0.756 | 0.61 |
|                           | Item 19<br>(loneliness)        | 46/5/0 | 29/6/1  | 827.0 | 0.190 | 0.531 | 0.55 |
|                           | Item 21<br>(peer network)      | 45/6/0 | 31/5/0  | 898.5 | 0.770 | 0.898 | 0.52 |
|                           | Item 25<br>(peer conflict)     | 49/2/0 | 31/4/1  | 825.5 | 0.091 | 0.509 | 0.56 |

<sup>a</sup>Number of participants in the group reporting responses of 0/1/2 on each item; <sup>b</sup> $P_{adj}$ : Benjamini-Hochberg FDR

correction; <sup>c</sup>PS: Probability of superiority

Note: We report frequencies, rather than medians, as we believe this additional information demonstrates the proportion of individuals endorsing symptoms of a certain severity level or higher.

**Table S3***Item-level analyses of CDI-2 between males and females in the ASD group*

|                                 |                                 | <b>Nonsignificant Differences (28/28 items)</b> |                                         |          |          |                                    |                                 |
|---------------------------------|---------------------------------|-------------------------------------------------|-----------------------------------------|----------|----------|------------------------------------|---------------------------------|
| <b>CDI-2 Subscale</b>           | <b>CDI-2 Items</b>              | <b>Males<sup>a</sup><br/>(n = 93)</b>           | <b>Females<sup>a</sup><br/>(n = 32)</b> | <b>U</b> | <b>p</b> | <b>P<sub>adj</sub><sup>a</sup></b> | <b>PS<sup>b</sup><br/>(0-1)</b> |
| Negative Mood/Physical Symptoms | Item 1<br>(low mood)            | 77/14/2                                         | 25/5/2                                  | 1367.0   | 0.445    | 1.000                              | 0.54                            |
|                                 | Item 9<br>(crying)              | 77/13/3                                         | 28/2/2                                  | 1407.0   | 0.654    | 0.915                              | 0.52                            |
|                                 | Item 10<br>(irritability)       | 51/35/7                                         | 19/10/3                                 | 1434.5   | 0.884    | 0.952                              | 0.51                            |
|                                 | Item 15<br>(sleep quality)      | 48/30/15                                        | 15/11/6                                 | 1348.0   | 0.495    | 0.924                              | 0.54                            |
|                                 | Item 16<br>(low energy)         | 57/22/14                                        | 22/8/2                                  | 1286.0   | 0.455    | 1.000                              | 0.56                            |
|                                 | Item 17<br>(appetite)           | 64/14/15                                        | 26/2/4                                  | 1300.5   | 0.299    | 1.000                              | 0.56                            |
|                                 | Item 18<br>(somatic)            | 55/26/12                                        | 22/10/0                                 | 1278.0   | 0.235    | 1.000                              | 0.57                            |
|                                 | Item 26<br>(low energy)         | 68/16/9                                         | 25/4/3                                  | 1399.5   | 0.749    | 0.911                              | 0.52                            |
|                                 | Item 27<br>(appetite)           | 74/7/12                                         | 24/6/2                                  | 1348.0   | 0.615    | 0.906                              | 0.54                            |
|                                 | Negative Self-Esteem            | Item 2<br>(hopelessness)                        | 52/37/4                                 | 17/14/1  | 1397.0   | 0.695                              | 0.884                           |
| Item 6<br>(self-concept)        |                                 | 82/11/0                                         | 25/5/2                                  | 1287.5   | 0.111    | 1.000                              | 0.56                            |
| Item 7<br>(guilt)               |                                 | 64/22/7                                         | 20/10/2                                 | 1355.0   | 0.481    | 0.962                              | 0.54                            |
| Item 8<br>(suicidality)         |                                 | 72/21/0                                         | 27/5/0                                  | 1366.5   | 0.462    | 1.000                              | 0.54                            |
| Item 13<br>(appearance)         |                                 | 72/20/1                                         | 25/6/1                                  | 1446.5   | 0.934    | 0.968                              | 0.50                            |
| Item 24<br>(being loved)        |                                 | 75/16/2                                         | 28/1/3                                  | 1389.0   | 0.557    | 0.917                              | 0.53                            |
| Ineffectiveness                 | Item 3<br>(daily activity)      | 70/22/1                                         | 25/4/3                                  | 1453.5   | 0.979    | 0.979                              | 0.51                            |
|                                 | Item 4<br>(anhedonia)           | 53/39/1                                         | 21/11/0                                 | 1348.5   | 0.467    | 1.000                              | 0.54                            |
|                                 | Item 12<br>(concentration)      | 29/46/18                                        | 12/18/2                                 | 1288.0   | 0.329    | 1.000                              | 0.56                            |
|                                 | Item 14<br>(volition)           | 42/21/30                                        | 18/9/5                                  | 1219.5   | 0.166    | 1.000                              | 0.59                            |
|                                 | Item 20<br>(anhedonia)          | 45/30/18                                        | 17/12/3                                 | 1355.0   | 0.523    | 0.915                              | 0.54                            |
|                                 | Item 22<br>(school performance) | 68/18/7                                         | 22/7/3                                  | 1361.5   | 0.558    | 0.868                              | 0.54                            |
|                                 | Item 23<br>(worthlessness)      | 51/27/15                                        | 13/10/9                                 | 1168.5   | 0.071    | 1.000                              | 0.60                            |
|                                 | Item 28<br>(memory)             | 38/41/14                                        | 11/16/5                                 | 1327.0   | 0.471    | 1.000                              | 0.55                            |
| Interpersonal                   | Item 5                          | 71/20/2                                         | 25/7/0                                  | 1438.0   | 0.882    | 1.000                              | 0.51                            |

| Problems | (low mood)                     |         |         |        |       |       |      |
|----------|--------------------------------|---------|---------|--------|-------|-------|------|
|          | Item 11<br>(peer satisfaction) | 73/17/3 | 25/6/1  | 1438.5 | 0.882 | 0.987 | 0.51 |
|          | Item 19<br>(loneliness)        | 54/30/9 | 18/10/4 | 1388.5 | 0.656 | 0.874 | 0.53 |
|          | Item 21<br>(peer network)      | 53/32/8 | 21/11/0 | 1310.0 | 0.380 | 1.000 | 0.56 |
|          | Item 25<br>(peer conflict)     | 67/21/5 | 27/4/1  | 1271.5 | 0.194 | 1.000 | 0.57 |

<sup>a</sup>Number of participants in the group reporting responses of 0/1/2 on each item; <sup>b</sup> $P_{adj}$ : Benjamini-Hochberg FDR

correction; <sup>c</sup>PS: Probability of superiority

Note: We report frequencies, rather than medians, as we believe this additional information demonstrates the proportion of individuals endorsing symptoms of a certain severity level or higher.

**Table S4***Item-level analyses of CDI-2 as rated by females between diagnostic groups (ASD vs. NT)*

|                                 |                            | <b>Significant Differences (2/28 items)</b>     |                                     |          |          |                                    |                                 |
|---------------------------------|----------------------------|-------------------------------------------------|-------------------------------------|----------|----------|------------------------------------|---------------------------------|
| <b>CDI-2 Subscale</b>           | <b>CDI-2 Items</b>         | <b>NT<sup>a</sup><br/>(n = 36)</b>              | <b>ASD<sup>a</sup><br/>(n = 32)</b> | <b>U</b> | <b>p</b> | <b>P<sub>adj</sub><sup>b</sup></b> | <b>PS<sup>c</sup><br/>(0-1)</b> |
| Interpersonal Problems          | Item 19<br>(loneliness)    | 29/6/1                                          | 17/11/4                             | 407.5    | 0.020    | 0.041                              | 0.65                            |
|                                 | Item 23<br>(worthlessness) | 27/8/1                                          | 12/11/9                             | 324.5    | 0.001    | 0.028                              | 0.72                            |
|                                 |                            | <b>Nonsignificant Differences (26/28 items)</b> |                                     |          |          |                                    |                                 |
| Negative Mood/Physical Symptoms | Item 1<br>(low mood)       | 32/4/0                                          | 25/5/2                              | 490.0    | 0.184    | 0.468                              | 0.58                            |
|                                 | Item 9<br>(crying)         | 28/7/1                                          | 28/2/2                              | 512.0    | 0.386    | 0.600                              | 0.56                            |
|                                 | Item 10<br>(irritability)  | 21/12/3                                         | 19/10/3                             | 553.5    | 0.948    | 0.948                              | 0.52                            |
|                                 | Item 15<br>(sleep quality) | 23/9/4                                          | 15/11/6                             | 448.5    | 0.124    | 0.386                              | 0.62                            |
|                                 | Item 16<br>(low energy)    | 19/14/3                                         | 22/8/2                              | 467.0    | 0.280    | 0.522                              | 0.60                            |
|                                 | Item 17<br>(appetite)      | 31/5/0                                          | 26/2/4                              | 517.5    | 0.429    | 0.632                              | 0.56                            |
|                                 | Item 18<br>(somatic)       | 26/8/2                                          | 22/10/0                             | 543.0    | 0.813    | 0.875                              | 0.53                            |
|                                 | Item 26<br>(low energy)    | 33/2/1                                          | 25/4/3                              | 477.5    | 0.102    | 0.408                              | 0.59                            |
|                                 | Item 27<br>(appetite)      | 29/4/3                                          | 23/6/2                              | 506.0    | 0.549    | 0.668                              | 0.57                            |
| Negative Self-Esteem            | Item 2<br>(hopelessness)   | 27/9/0                                          | 17/14/1                             | 423.0    | 0.042    | 0.196                              | 0.64                            |
|                                 | Item 6<br>(self-concept)   | 30/5/1                                          | 25/5/2                              | 522.5    | 0.516    | 0.722                              | 0.55                            |
|                                 | Item 7<br>(guilt)          | 30/6/0                                          | 20/10/2                             | 429.0    | 0.036    | 0.252                              | 0.63                            |
|                                 | Item 8<br>(suicidality)    | 34/1/1                                          | 27/5/0                              | 501.5    | 0.180    | 0.504                              | 0.57                            |
|                                 | Item 13<br>(appearance)    | 23/12/1                                         | 25/6/1                              | 485.5    | 0.253    | 0.506                              | 0.58                            |
|                                 | Item 24<br>(being loved)   | 36/3/0                                          | 26/2/4                              | 486.0    | 0.027    | 0.054                              | 0.58                            |
| Ineffectiveness                 | Item 3<br>(daily activity) | 31/5/0                                          | 25/4/3                              | 502.0    | 0.291    | 0.509                              | 0.57                            |
|                                 | Item 4<br>(anhedonia)      | 25/11/0                                         | 21/11/0                             | 494.0    | 0.210    | 0.490                              | 0.58                            |
|                                 | Item 12<br>(concentration) | 11/21/4                                         | 12/18/2                             | 515.5    | 0.542    | 0.689                              | 0.56                            |
|                                 | Item 14<br>(volition)      | 19/14/3                                         | 18/9/5                              | 548.0    | 0.888    | 0.920                              | 0.52                            |
|                                 | Item 20<br>(anhedonia)     | 21/12/3                                         | 17/12/3                             | 520.5    | 0.595    | 0.694                              | 0.55                            |
|                                 | Item 22                    | 30/6/0                                          | 22/7/3                              | 462.0    | 0.104    | 0.364                              | 0.60                            |

|                           |                                |         |         |       |       |       |      |
|---------------------------|--------------------------------|---------|---------|-------|-------|-------|------|
|                           | (school performance)           |         |         |       |       |       |      |
|                           | Item 28<br>(memory)            | 17/15/4 | 11/16/5 | 469.0 | 0.220 | 0.473 | 0.60 |
| Interpersonal<br>Problems | Item 5<br>(low mood)           | 32/4/0  | 25/7/0  | 522.5 | 0.516 | 0.688 | 0.55 |
|                           | Item 11<br>(peer satisfaction) | 24/11/1 | 25/6/1  | 500.5 | 0.357 | 0.588 | 0.57 |
|                           | Item 21<br>(peer network)      | 31/5/0  | 21/11/0 | 437.5 | 0.040 | 0.223 | 0.63 |
|                           | Item 25<br>(peer conflict)     | 31/4/1  | 27/4/1  | 545.5 | 0.799 | 0.894 | 0.53 |

<sup>a</sup>Number of participants in the group reporting responses of 0/1/2 on each item; <sup>b</sup>P<sub>adj</sub>: Benjamini-Hochberg FDR

correction; <sup>c</sup>PS: Probability of superiority

Note: We report frequencies, rather than medians, as we believe this additional information demonstrates the proportion of individuals endorsing symptoms of a certain severity level or higher.

**Table S5***Item-level analyses of CDI-2 as rated by males between diagnostic groups (ASD vs. NT)*

| <b>Significant Differences (10/28 items)</b>    |                            |                                    |                                     |                 |                 |                                           |                                        |
|-------------------------------------------------|----------------------------|------------------------------------|-------------------------------------|-----------------|-----------------|-------------------------------------------|----------------------------------------|
| <b>CDI-2 Subscale</b>                           | <b>CDI-2 Items</b>         | <b>NT<sup>a</sup><br/>(n = 51)</b> | <b>ASD<sup>a</sup><br/>(n = 93)</b> | <b><i>U</i></b> | <b><i>p</i></b> | <b><i>P<sub>adj</sub><sup>b</sup></i></b> | <b><i>PS<sup>c</sup></i><br/>(0-1)</b> |
| Negative Mood/Physical Symptoms                 | Item 15<br>(sleep quality) | 40/8/3                             | 48/30/15                            | 1751.5          | 0.002           | 0.009                                     | 0.63                                   |
|                                                 | Item 26<br>(low energy)    | 50/1/0                             | 69/15/9                             | 1801.5          | <0.001          | <0.001                                    | 0.62                                   |
| Negative Self-Esteem                            | Item 24<br>(being loved)   | 49/2/0                             | 75/16/2                             | 2030.0          | 0.011           | 0.034                                     | 0.57                                   |
| Ineffectiveness                                 | Item 12<br>(concentration) | 24/25/2                            | 30/46/17                            | 1854.0          | 0.017           | 0.047                                     | 0.61                                   |
|                                                 | Item 20<br>(anhedonia)     | 34/17/0                            | 45/30/18                            | 1819.0          | 0.007           | 0.028                                     | 0.62                                   |
|                                                 | Item 23<br>(worthlessness) | 38/12/1                            | 51/27/15                            | 1860.5          | 0.010           | 0.035                                     | 0.61                                   |
|                                                 | Item 5<br>(low mood)       | 50/1/0                             | 71/20/2                             | 1882.0          | 0.001           | 0.006                                     | 0.61                                   |
| Interpersonal Problems                          | Item 19<br>(loneliness)    | 46/5/0                             | 54/30/9                             | 1615.0          | <0.001          | <0.001                                    | 0.66                                   |
|                                                 | Item 21<br>(peer network)  | 45/6/0                             | 54/32/7                             | 1635.0          | <0.001          | <0.001                                    | 0.66                                   |
|                                                 | Item 25<br>(peer conflict) | 49/2/0                             | 67/21/5                             | 1796.5          | <0.001          | <0.001                                    | 0.63                                   |
| <b>Nonsignificant Differences (18/28 items)</b> |                            |                                    |                                     |                 |                 |                                           |                                        |
| Negative Mood/Physical Symptoms                 | Item 1<br>(low mood)       | 46/5/0                             | 77/14/2                             | 2219.0          | 0.227           | 0.303                                     | 0.53                                   |
|                                                 | Item 9<br>(crying)         | 46/5/0                             | 77/13/3                             | 2216.5          | 0.221           | 0.309                                     | 0.54                                   |
|                                                 | Item 10<br>(irritability)  | 32/18/1                            | 51/35/7                             | 2173.5          | 0.287           | 0.349                                     | 0.55                                   |
|                                                 | Item 16<br>(low energy)    | 32/18/1                            | 57/22/14                            | 2222.0          | 0.468           | 0.504                                     | 0.54                                   |
|                                                 | Item 17<br>(appetite)      | 43/3/5                             | 65/14/14                            | 2043.5          | 0.071           | 0.133                                     | 0.57                                   |
|                                                 | Item 18<br>(somatic)       | 33/17/1                            | 55/26/12                            | 2185.0          | 0.308           | 0.359                                     | 0.54                                   |
|                                                 | Item 27<br>(appetite)      | 42/6/3                             | 74/7/12                             | 2310.0          | 0.600           | 0.622                                     | 0.52                                   |
|                                                 | Negative Self-Esteem       | Item 2<br>(hopelessness)           | 35/16/0                             | 52/37/4         | 2071.5          | 0.114                                     | 0.199                                  |
| Item 6<br>(self-concept)                        |                            | 49/2/0                             | 82/11/0                             | 2210.5          | 0.119           | 0.195                                     | 0.54                                   |
| Item 7<br>(guilt)                               |                            | 40/11/0                            | 64/22/7                             | 2136.0          | 0.166           | 0.245                                     | 0.55                                   |
| Item 8<br>(suicidality)                         |                            | 46/5/0                             | 72/21/0                             | 2096.5          | 0.061           | 0.122                                     | 0.56                                   |



|                        |                                 |         |          |        |       |       |      |
|------------------------|---------------------------------|---------|----------|--------|-------|-------|------|
|                        | Item 13<br>(appearance)         | 40/11/0 | 72/20/1  | 2373.0 | 0.890 | 0.890 | 0.50 |
|                        | Item 3<br>(daily activity)      | 44/7/0  | 70/22/1  | 2136.0 | 0.124 | 0.193 | 0.55 |
|                        | Item 4<br>(anhedonia)           | 39/12/0 | 53/39/1  | 1935.0 | 0.022 | 0.055 | 0.59 |
| Ineffectiveness        | Item 14<br>(volition)           | 31/12/8 | 42/21/30 | 1905.0 | 0.033 | 0.077 | 0.60 |
|                        | Item 22<br>(school performance) | 40/11/0 | 68/18/7  | 2207.0 | 0.363 | 0.406 | 0.54 |
|                        | Item 28<br>(memory)             | 27/23/1 | 38/41/14 | 1944.5 | 0.049 | 0.105 | 0.59 |
| Interpersonal Problems | Item 11<br>(peer satisfaction)  | 44/7/0  | 73/17/3  | 2205.5 | 0.241 | 0.307 | 0.54 |

<sup>a</sup>Number of participants in the group reporting responses of 0/1/2 on each item; <sup>b</sup> $P_{adj}$ : Benjamini-Hochberg FDR

correction; <sup>c</sup>PS: Probability of superiority

Note: We report frequencies, rather than medians, as we believe this additional information demonstrates the proportion of individuals endorsing symptoms of a certain severity level or higher.
